# Supplementary material for: Intracellular trafficking of HLA-E and its regulation
Source: PubMed Central journal article supplement (PMC10165540; doi:10.1084/jem.20221941), 2023-05-04

Figure 1 – B  
Uncropped gel

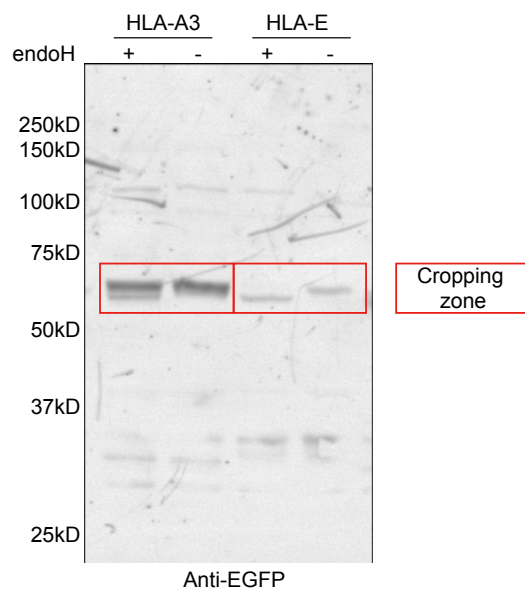

Supplement: JEM_20221941_SourceDataF1.pdf [file JEM_20221941_SourceDataF1.pdf]
